# Supplementary material for: pH-responsive host–guest polymerization and blending
Source: Royal Society of Chemistry journal article supplement (doi:10.1039/c4ra14793f), 2015-01-01
Supplement: c4ra14793f1.pdf [file c4ra14793f1.pdf]

**Electronic Supplementary Information**

**pH responsive host-guest polymerization and blending**

**Daniele Masseroni,<sup>a</sup> Enrico Rampazzo,<sup>b</sup> Federico Rastrelli,<sup>c</sup> Davide Orsi,<sup>d</sup> Lucia Ricci,<sup>e</sup> Giacomo Ruggeri<sup>e</sup> and Enrico Dalcanale<sup>\*a</sup>**

<sup>a</sup> Dipartimento di Chimica and INSTM, UdR Parma, Università di Parma, Viale delle Scienze 17/A, 43124 Parma, Italy; E-mail: [enrico.dalcanale@unipr.it](mailto:enrico.dalcanale@unipr.it)

<sup>b</sup> Dipartimento di Chimica "G. Ciamician" and INSTM, UdR Bologna, Università di Bologna, Via Selmi 2, 40126 Bologna.

<sup>c</sup> Dipartimento di Scienze Chimiche, Università degli Studi di Padova, Via Marzolo 1, 35131 Padova, Italy.

<sup>d</sup> Dipartimento di Fisica, Università di Parma, Viale delle Scienze 7/A, 43124 Parma, Italy.

<sup>e</sup> Dipartimento di Chimica e Chimica Industriale and INSTM, UdR Pisa, Università di Pisa, Via Risorgimento 35, 56126 Pisa Italy.

**Contents**

|                                      |         |
|--------------------------------------|---------|
| Homopolymer Characterization and ITC | S2-S7   |
| Synthesis of PBMA-Sarc               | S8-S19  |
| PBMA-Sarc Characterization           | S10-S12 |

## Homopolymer Characterization

### Homopolymer **5**

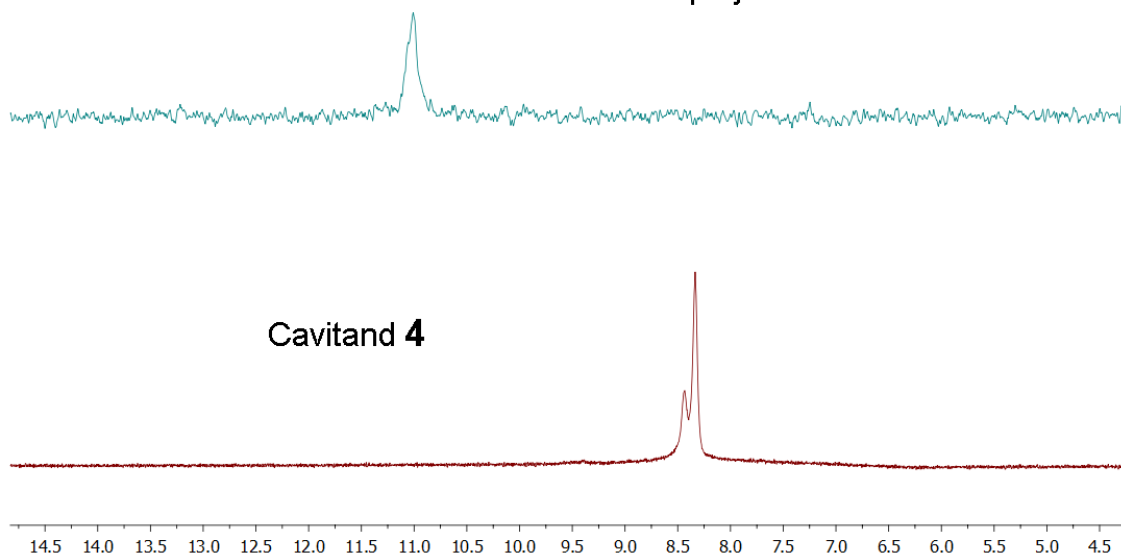

**Figure S1**  $^{31}\text{P}\{^1\text{H}\}$  NMR spectra ( $\text{CDCl}_3$ , 400 MHz, 25 °C) of the cavitant **4** and the homopolymer **5**.

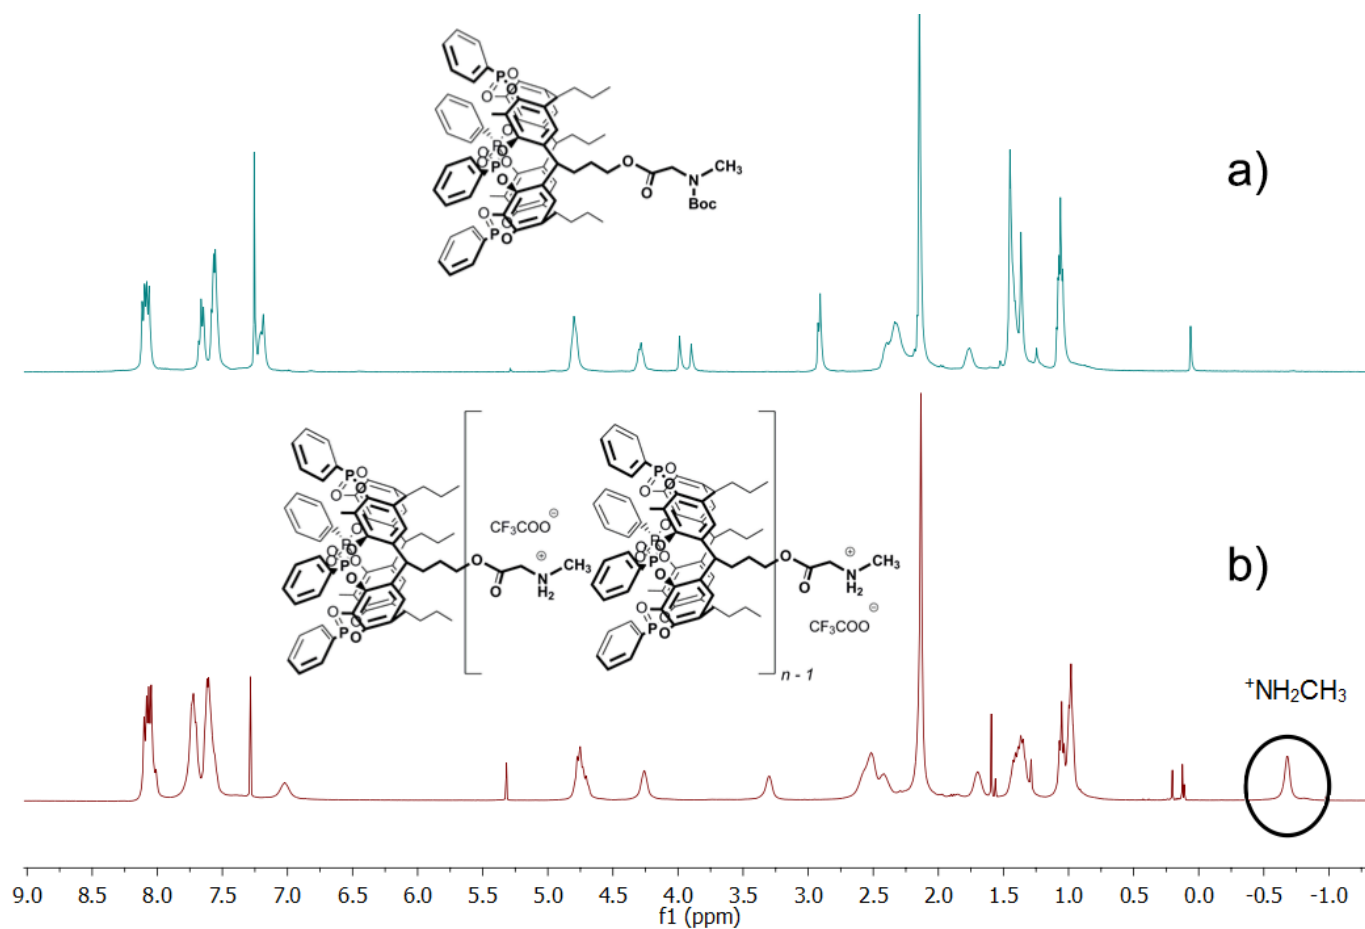

**Figure S2**  $^1\text{H}$  NMR spectra ( $\text{CDCl}_3$ , 400 MHz, 10 mM, 25 °C) of: a) monomer BOC protected; b) homopolymer **5**.

## ITC measurements

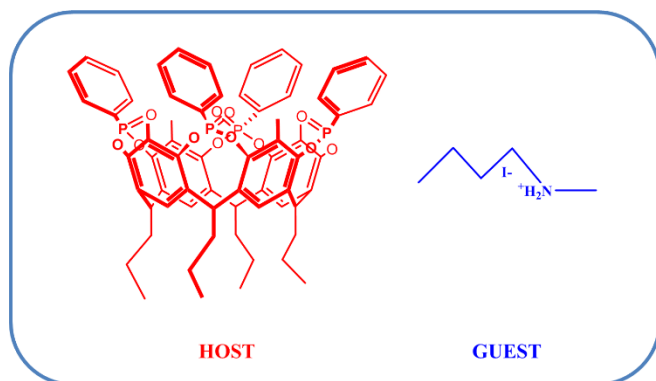

**Solvent**  $\text{CH}_2\text{Cl}_2$

T = 298 K

HOST concentration = 0.405 mM

GUEST concentration = 5.93 mM

N° of experiments = 3

Typical obtained ITC trace:

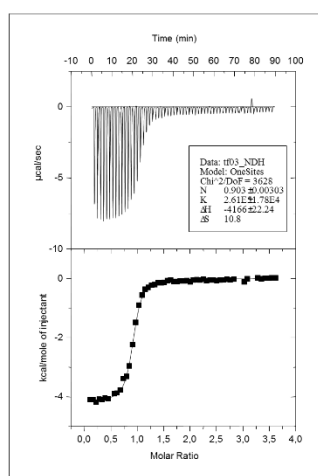

|                                      |                            |
|--------------------------------------|----------------------------|
| <b>K</b> ( $\text{M}^{-1}$ )         | $(2,6 \pm 0,1) \cdot 10^6$ |
| $\Delta H$ ( $\text{KJ mol}^{-1}$ )  | $-43,1 \pm 0,1$            |
| $T\Delta S$ ( $\text{KJ mol}^{-1}$ ) | $-6,1 \pm 0,7$             |
| $\Delta G$ ( $\text{KJ mol}^{-1}$ )  | $-37,0 \pm 0,1$            |
| <b>N</b>                             | $0,844 \pm 0,07$           |

24

**Figure S3**  $K_a$  determination of  $\text{Tiii}[\text{C}_3\text{H}_7, \text{CH}_3, \text{Ph}]@N,N\text{-methylbutyl ammonium iodide}$  complex in dichloromethane by ITC

## Homopolymer Characterization

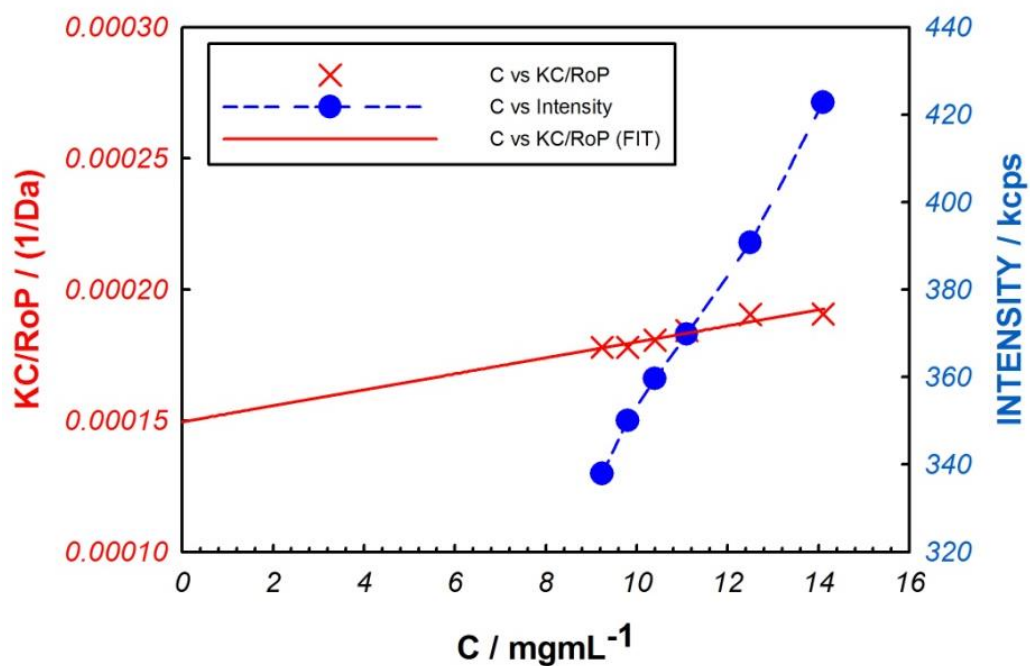

**Figure S4** Debye plot for the SLS analysis ( $\text{CHCl}_3$ ,  $25^\circ\text{C}$ ) of **TiIII** homopolymer in the 9.2-14.1  $\text{mg mL}^{-1}$  concentration range ( $M_w = 7 \pm 1$  KDa).

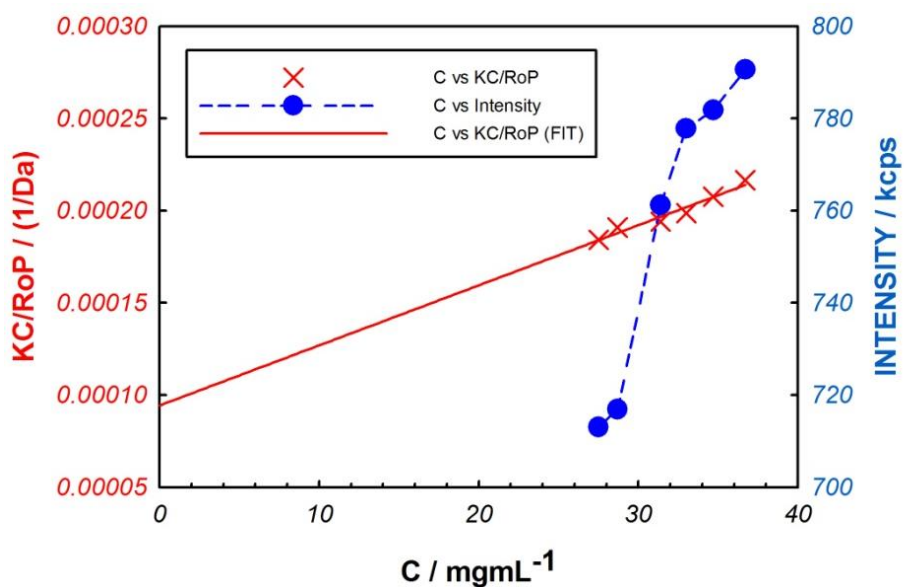

**Figure S5** Debye plot for the SLS analysis ( $\text{CHCl}_3$ ,  $25^\circ\text{C}$ ) of homopolymer **5** in the 25.5-36.7  $\text{mg mL}^{-1}$  concentration range ( $M_w = 11 \pm 1$  KDa).

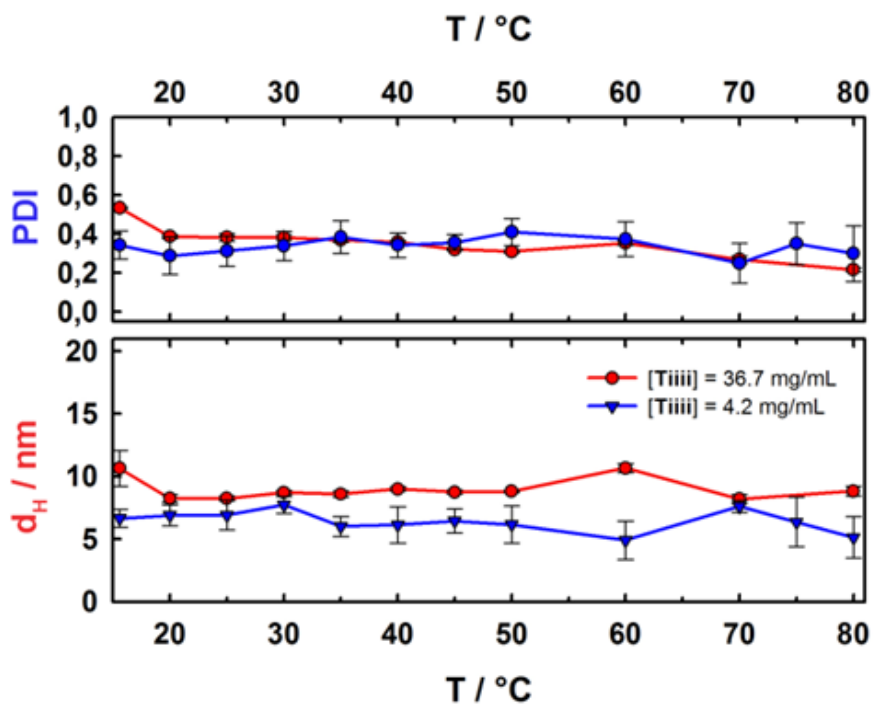

**Figure S6.** DLS experiment at various temperature for two different concentration: 36.7 and 4.2 mg mL<sup>-1</sup>.

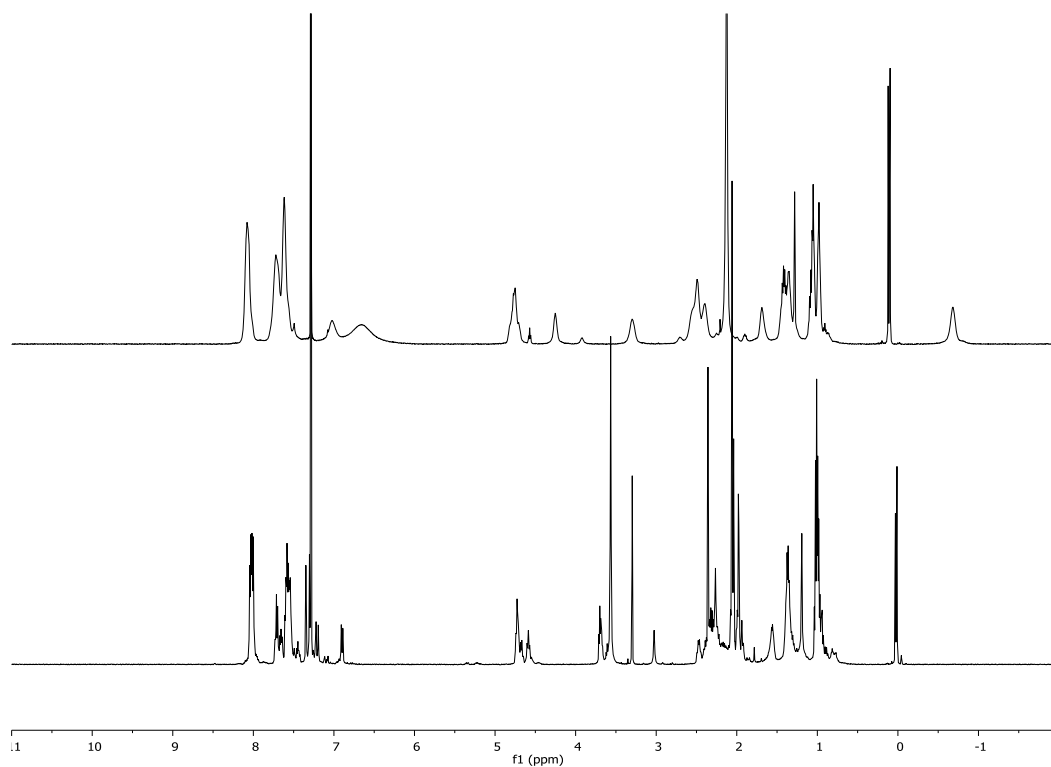

**Figure S7** 500 MHz <sup>1</sup>H NMR spectra of 5 mM **5** in CDCl<sub>3</sub>. Top: before addition of aqueous NaOD in CD<sub>3</sub>OD (see text), Bottom: after addition of aqueous NaOD in CD<sub>3</sub>OD (see text).

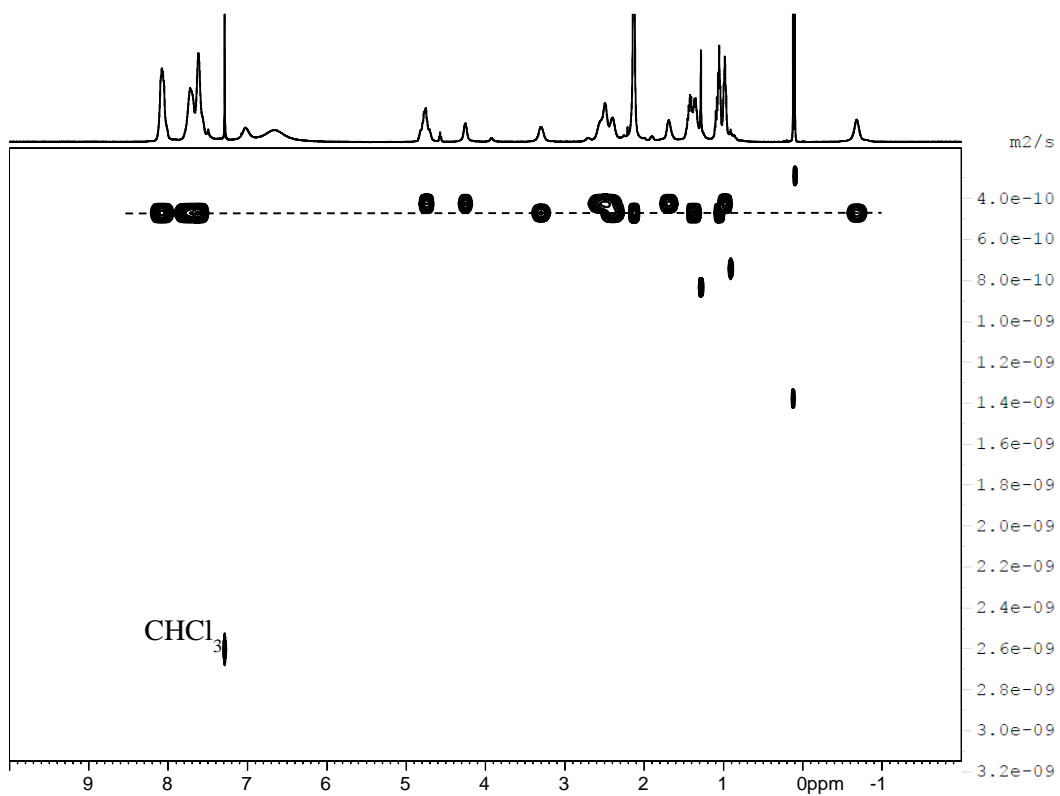

**Figure S8** <sup>1</sup>H DOSY map of 5 mM **5** in CDCl<sub>3</sub> before addition of aqueous NaOD in CD<sub>3</sub>OD (see text). The line is drawn at the average value of the diffusion coefficient estimated for the homopolymer.

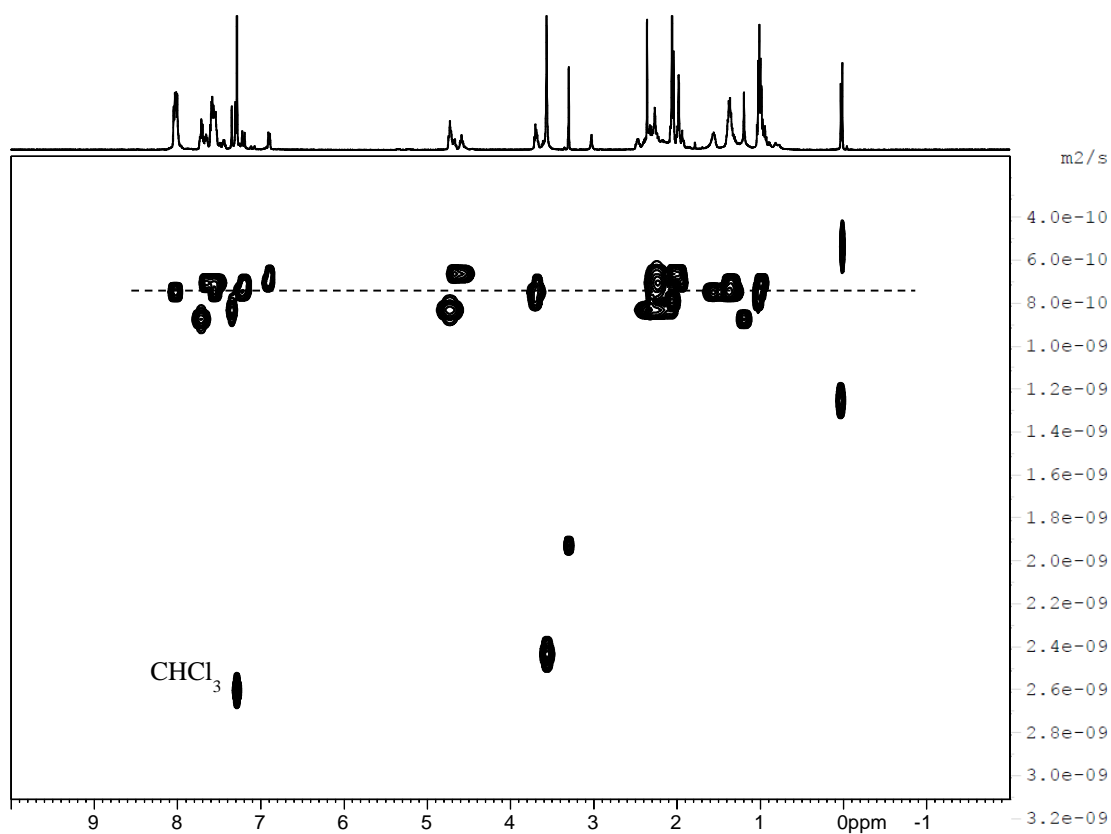

**Figure S9** <sup>1</sup>H DOSY map of 5 mM homopolymer **5** in CDCl<sub>3</sub> after addition of aqueous NaOD in CD<sub>3</sub>OD (see text). The line is drawn at the average value of the diffusion coefficient estimated for the monomer (only signals with the lowest fitting errors have been retained in the average). Scattering in the diffusion dimension is possibly due to equilibria between monomeric and residual oligomeric forms.

## Synthesis of PBMA-Sarc

### Synthesis of 6-((methylglycyl)oxy)hexyl methacrylate

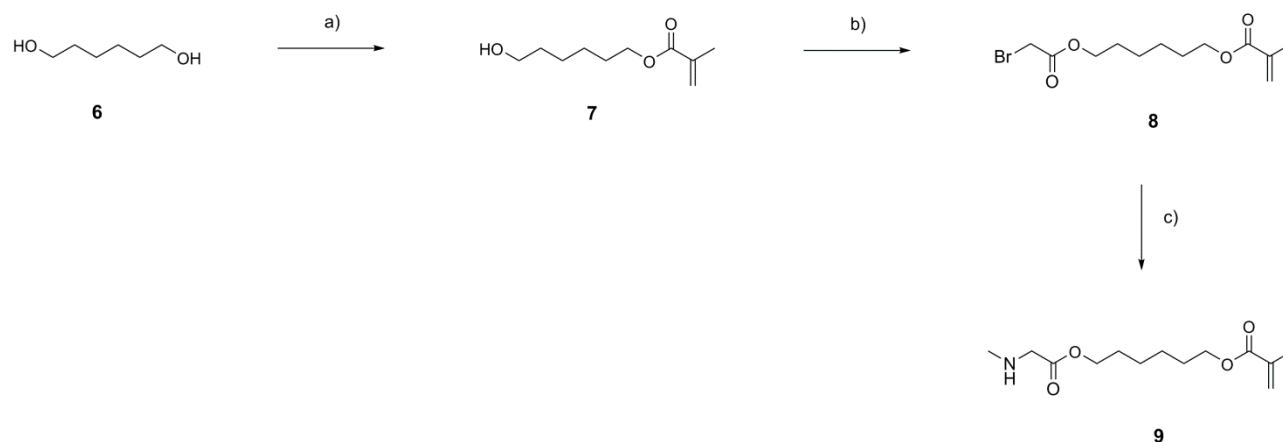

**Scheme S1** Synthesis of monomer **9**: a) methacryloyl chloride, DMAP, Et<sub>3</sub>N, DCM, r.t., 12 h, 48%; b) bromoacetyl chloride, Et<sub>3</sub>N, DCM, r.t., 2 h, 66%; c) methylamine, NaI, ACN, r.t., 1 h, 87%.

### 6-hydroxyhexyl methacrylate (7)

To a solution of 1,6-hexanediol **6** (5.6 g, 48 mmol) in dichloromethane, DMAP (0.46 g, 4 mmol) and triethylamine (3.96 ml, 29 mmol) were added. The mixture was cooled at 0 °C and methacryloyl chloride (1.85 ml, 20 mmol) was added dropwise. The solution was warmed at room temperature and stirred overnight. The reaction was quenched with water, the organic phase was separated and evaporated under reduced pressure. The crude was purified by silica gel column chromatography (hexane:dichloromethane 7:3) to give **7** as colorless oil (1.86 g, 9.7 mmol, 48 %).

<sup>1</sup>H NMR (CDCl<sub>3</sub>, 400 MHz): δ (ppm) = 6.05 (s, 1H, H<sub>TRANS</sub>HC=C), 5.51 (s, 1H, H<sub>CIS</sub>HC=C), 4.10 (t, 2H, <sup>3</sup>J= 6.6 Hz, (C=O)OCH<sub>2</sub>CH<sub>2</sub>), 3.58 (t, 2H, <sup>3</sup>J= 6.6 Hz, CH<sub>2</sub>CH<sub>2</sub>OH), 2.39 (s, 1H, CH<sub>2</sub>OH), 1.90 (s, 3H, CH<sub>3</sub>), 1.65 (m, 2H, (C=O)OCH<sub>2</sub>CH<sub>2</sub>), 1.54 (m, 2H, CH<sub>2</sub>CH<sub>2</sub>OH), 1.37 (m, 4H, CH<sub>2</sub>CH<sub>2</sub>CH<sub>2</sub>CH<sub>2</sub>); ESI-MS: *m/z* 209.2 [M+Na]<sup>+</sup>.

### 6-(2-bromoacetoxy)hexyl methacrylate (8)

To a solution of **7** (0.8 g, 4.3 mmol) in dichloromethane, bromo acetyl bromide (1.354 g, 8.6 mmol) and triethylamine (1.2 mL, 8.6 mmol) were added. The reaction mixture was stirred for 2 h at room temperature and quenched adding 10% HCl solution. The organic phase was extracted twice with water and brine, dried with MgSO<sub>4</sub> and evaporated under *vacuo*. Purification by silica gel column chromatography (hexane:ethyl acetate 8:2) yielded the desired product **8** as colorless oil (0.86 g, 2.8 mmol, 66%).

<sup>1</sup>H NMR (CDCl<sub>3</sub>, 400 MHz): δ (ppm) = 6.09 (s, 1H, H<sub>CIS</sub>HC=C), 5.55 (s, 1H, H<sub>TRANS</sub>HC=C), 4.19-4.13 (m, 4H, CH<sub>2</sub>O), 3.83 (s, 2H, CH<sub>2</sub>Br), 1.94 (s, 3H, CH<sub>3</sub>), 1.69-1.67 (m, 4H, OCH<sub>2</sub>CH<sub>2</sub>), 1.45-1.42 (m, 4H, OCH<sub>2</sub>CH<sub>2</sub>CH<sub>2</sub>); ESI-MS: *m/z* 308 [M+H]<sup>+</sup>.

### 6-((methylglycyl)oxy)hexyl methacrylate (9)

**8** (0.34 g, 1.12 mmol) was dissolved in acetonitrile and sodium iodide (0.25 g, 1.67 mmol) was added. After 5 minutes of stirring a solution of methylamine (0.6 mL, 22.4 mmol) in 3 mL of methanol was added. The solution was stirred at room temperature for 1 h. The reaction mixture was diluted with dichloromethane and the organic phase extracted twice with sat. aq. NaHCO<sub>3</sub> and water. The organic phase was dried with



anhydrous Na<sub>2</sub>SO<sub>4</sub> and the solvent removed *in vacuo*. Purification by silica gel column chromatography (hexane:ethyl acetate 1:1) afforded the pure product **9** as colorless oil (0.25 g, 0.97 mmol, 87%).

<sup>1</sup>H NMR (CDCl<sub>3</sub>, 400 MHz): δ (ppm) = 6.11 (s, 1H, H<sub>CIS</sub>HC=C), 5.57 (s, 1H, H<sub>TRANS</sub>HC=C), 4.18-4.14 (m, 4H, CH<sub>2</sub>O), 3.4 (s, 2H, NCH<sub>2</sub>C(O)), 2.47 (s, 3H, NCH<sub>3</sub>), 1.96 (s, 3H, CH<sub>3</sub>), 1.73-1.66 (m, 4H, CH<sub>2</sub>CH<sub>2</sub>O), 1.44-1.40 (m, 4H, CH<sub>2</sub>CH<sub>2</sub>CH<sub>2</sub>O); ESI-MS: *m/z* 258 [M+H]<sup>+</sup>.

### Copolymerization between n-butyl methacrylate and 6-((methylglycyl)oxy)hexyl methacrylate (**9**) (PBMA-Sarc)

(10)

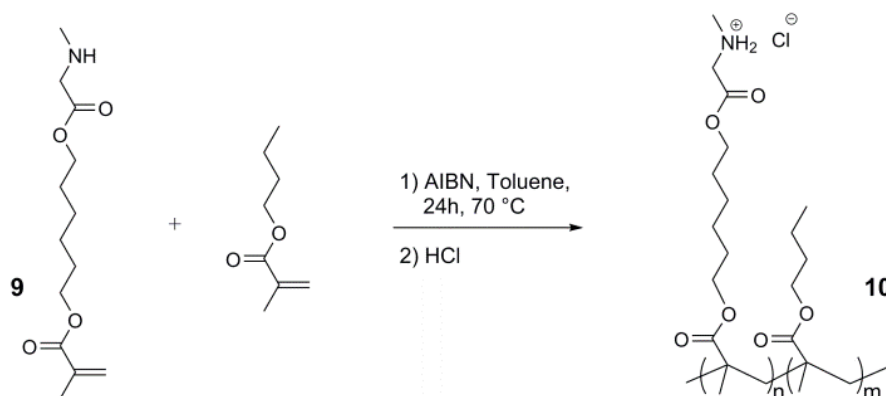

**Scheme S2** Synthesis of PBMA-Sarc.

In a Schlenk with magnetic stirrer n-butyl methacrylate (3.9 mL, 24.84 mmol) and **9** (0.266 g, 1.03 mmol) were dissolved in toluene under nitrogen atmosphere. The solution was purged with nitrogen for 30 minutes and heated to 70 °C, then AIBN was added (85 mg) and the polymerization mixture kept for 24 h in these conditions. At the end of the reaction, the copolymer was purified by twice precipitation in 500 mL of cold methanol and after filtration, copolymer was dried *under vacuum* at room temperature (yield 70%). Subsequently the polymer was dissolved in toluene and under stirring gaseous HCl was bubbled through the solution. Gaseous HCl was produced by the addition of concentrated H<sub>2</sub>SO<sub>4</sub> to dry NaCl. The polymer was precipitated twice from methanol.

<sup>1</sup>H NMR (CDCl<sub>3</sub>, 300 MHz): δ (ppm) = 3.96 (NCH<sub>2</sub>C(O), C(O)OCH<sub>2</sub>CH<sub>2</sub>), 2.29 (NCH<sub>3</sub>), 1.9-1.8 ([CH<sub>2</sub>C(CH<sub>3</sub>)(C(O)OC<sub>4</sub>H<sub>9</sub>)]<sub>n</sub>), 1.63 (C(O)OCH<sub>2</sub>CH<sub>2</sub>), 1.43 (CH<sub>2</sub>CH<sub>2</sub>CH<sub>3</sub>), 1.1-0.8 (CH<sub>2</sub>CH<sub>2</sub>CH<sub>3</sub>, [CH<sub>2</sub>C(CH<sub>3</sub>)(C(O)OC<sub>4</sub>H<sub>9</sub>)]<sub>n</sub>); IR (solution casting on KBr plate): 3410 (ν<sub>N-H</sub>), 2960 (asym ν<sub>C-H</sub> CH<sub>3</sub>), 2936 (asym ν<sub>C-H</sub> CH<sub>2</sub>), 2875 (sym ν<sub>C-H</sub> CH<sub>3</sub>), 1728 (ν<sub>C=O</sub>), 1466 (asym δ<sub>CH<sub>3</sub></sub>), 1385 (sym δ<sub>CH<sub>3</sub></sub>), 1268, 1242, 1177, 1154 (ν<sub>C-O-C</sub>), 750 (ρ<sub>CH<sub>2</sub></sub>), 666 (Wagging N-H) cm<sup>-1</sup>; **Elemental analysis**: theoretical C 66.41, H 9.81, N 0.38 %; found C 68.32, H 10.09, N 0.27 %; **GPC** (CHCl<sub>3</sub>):  $\overline{M}_n$  = 23200 Da,  $\overline{M}_w$  = 36600 Da, PDI = 1.58.

## PBMA-Sarc Characterization

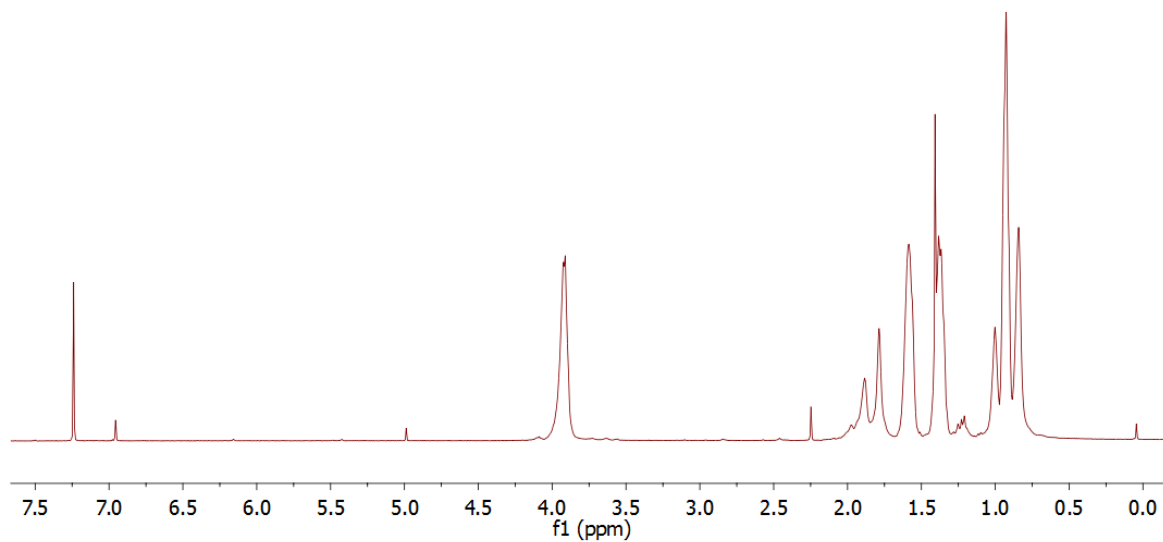

**Figure S10**  $^1\text{H}$  NMR ( $\text{CDCl}_3$ , 400 MHz) of PBMA-Sarc.

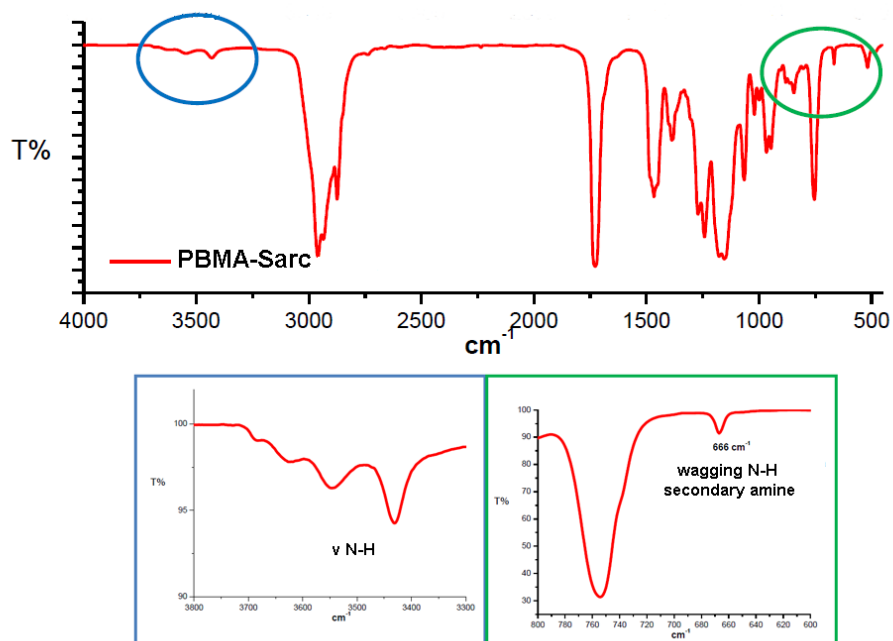

**Figure S11** FT-IR of PBMA-Sarc.

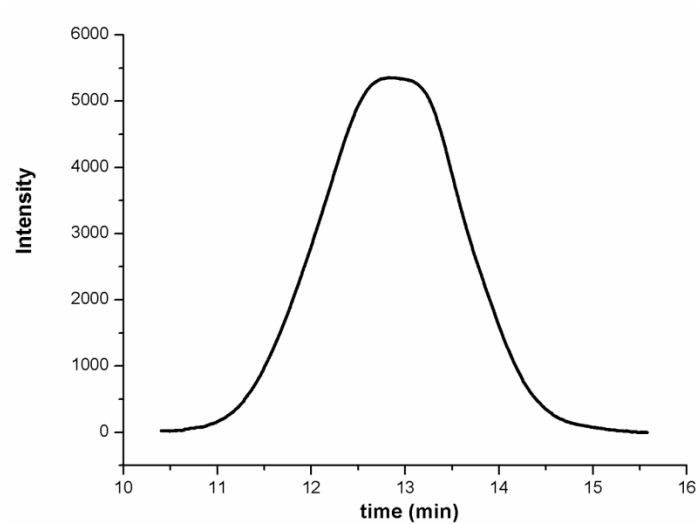

**Figure S12** RI chromatographic trace of PBMA-Sarc.

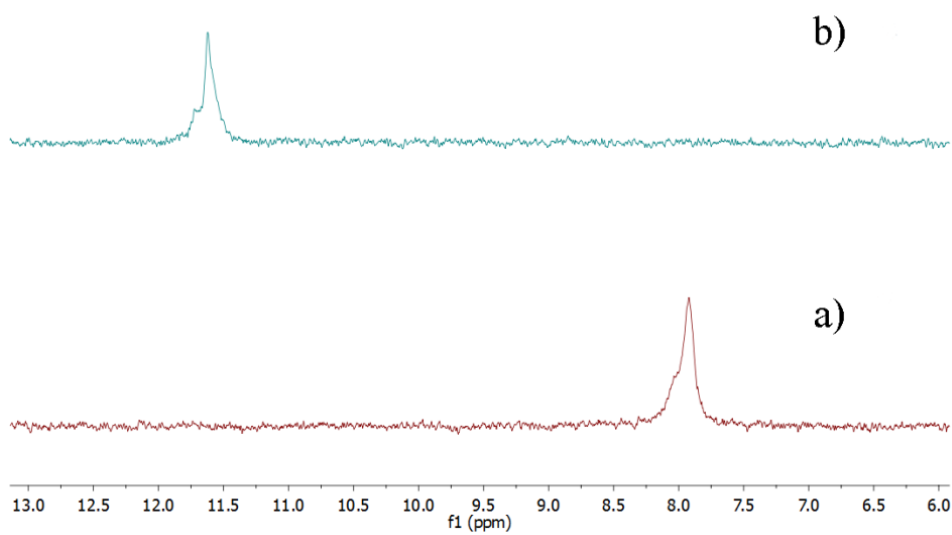

**Figure S13** <sup>31</sup>P NMR spectra in CDCl<sub>3</sub> a) PS-Host (0.5 mM), b) PS-Host:PBMA-Sarc 1:1 (0.5 mM).

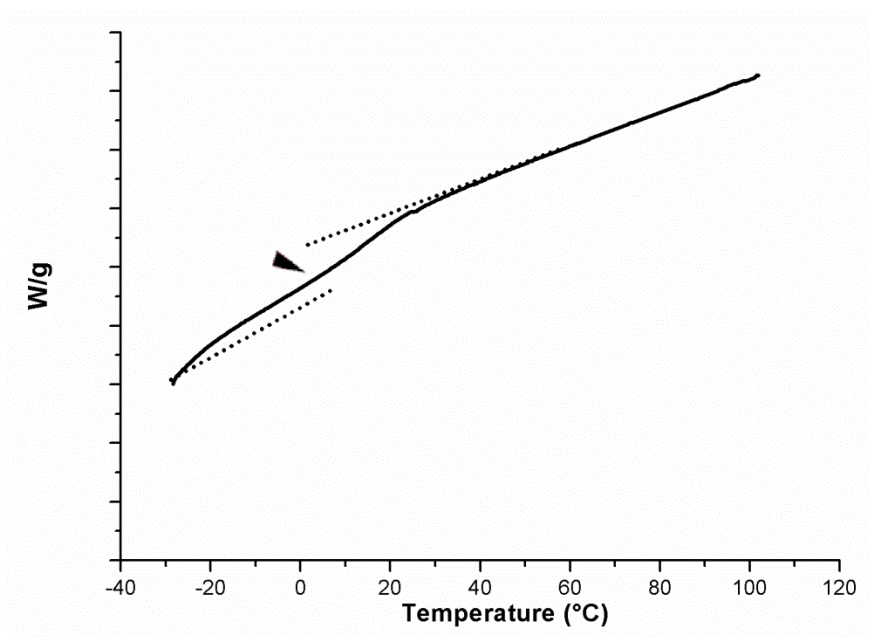

**Figure S14** DSC thermogram of PBMA-Sarc
